44. Verbeke H, Struyf S, Laureys G, Van Damme J: The expression and role of CXC chemokines in colorectal cancer. *Cytokine Growth Factor Rev* 2011; 22:345–58
45. Lin TC, Hsu CH, Lu CC, Tsai YC, Ho ST: Chronic opioid therapy in patients with chronic noncancer pain in Taiwan. *J Anesth* 2010; 24:882–7
46. Ohtori S, Suzuki M, Koshi T, Takaso M, Yamashita M, Inoue G, Yamauchi K, Orita S, Eguchi Y, Kuniyoshi K, Ochiai N, Kishida S, Nakamura J, Aoki Y, Ishikawa T, Arai G, Miyagi M, Kamoda H, Suzuki M, Toyone T, Takahashi K: Proinflammatory cytokines in the cerebrospinal fluid of patients with lumbar radiculopathy. *Eur Spine J* 2011; 20:942–6
47. Alexander GM, van Rijn MA, van Hilten JJ, Perreault MJ, Schwartzman RJ: Changes in cerebrospinal fluid levels of pro-inflammatory cytokines in CRPS. *Pain* 2005; 116:213–9
48. Milligan ED, Sloane EM, Watkins LR: Glia in pathological pain: A role for fractalkine. *J Neuroimmunol* 2008; 198:113–20
49. Abbadie C, Bhangoo S, De Koninck Y, Malcangio M, Melik-Parsadaniantz S, White FA: Chemokines and pain mechanisms. *Brain Res Rev* 2009; 60:125–34

## ANESTHESIOLOGY REFLECTIONS FROM THE WOOD LIBRARY-MUSEUM

### The Pentothal Tubing Bag of Frank L. Faust, M.D.

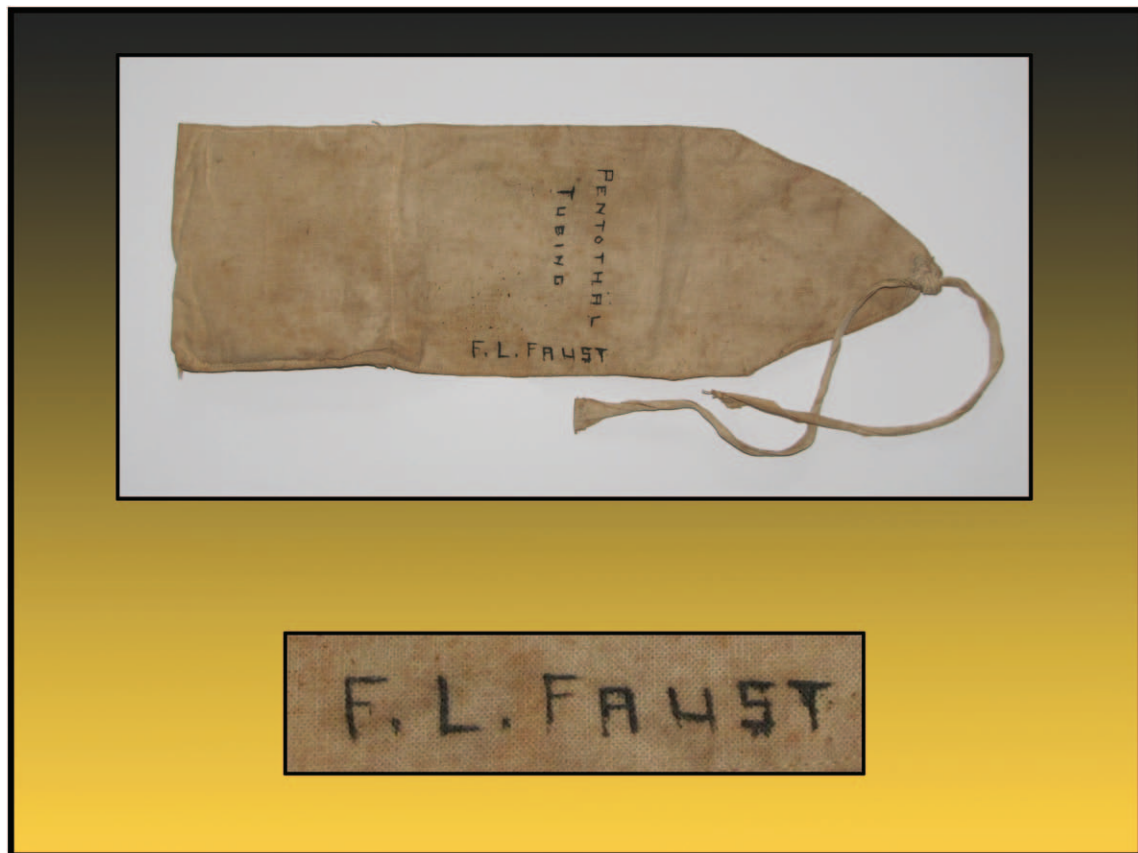

Measuring 13 × 4.5 in (33 × 11 cm), this cloth bag (*high*) sheltered rubber tubing dedicated to intravenous administration of sodium thiopental (branded as “Pentothal”) during the mid- to late-1940s by “F. L. Faust” (*low*), better known as Frank Leo Faust, M.D. (surgeon and anesthesiologist, New Orleans, Louisiana) (1916–2013). Perhaps a bag like this one held the “Pentothal tubing” used by Dr. Oral Crawford in the September 1949 *ANESTHESIOLOGY* article, “A Simplified Inexpensive Method for Holding Syringes of Pentothal Sodium for Continuous Injection.” Dr. Faust had trained initially in surgery under Dr. Rudolf Matas and alongside Drs. Michael DeBakey and Alton Ochsner. Following his 1944 “short course” in anesthesiology at the Lahey Clinic, Dr. Faust joined his lifelong colleague, Dr. John Adriani, in transforming the practice of anesthesiology in New Orleans. (Copyright © the American Society of Anesthesiologists, Inc.)

George S. Bause, M.D., M.P.H., Honorary Curator, ASA’s Wood Library-Museum of Anesthesiology, Schaumburg, Illinois, and Clinical Associate Professor, Case Western Reserve University, Cleveland, Ohio. UJYC@aol.com.
